# Supplementary material for: Technical Note: Coupling of chemical processes with the Modular Earth Submodel System (MESSy) submodel TRACER
Source: Copernicus journal article supplement (doi:10.5194/acp-8-1677-2008), 2008-03-19
Supplement: Supplementary file 1 [file acp-8-1677-2008-supplement.zip]

Archive with 35 entries (34 files):
- tracer/
- tracer/messy_main_tracer_pdef.f90
- tracer/Makefile
- tracer/messy_othersm_si.f90
- tracer/messy_main_tracer_mem_bi.f90
- tracer/messy_main_tracer_pdef_si.f90
- tracer/depend.mk
- tracer/messy_ptrac_si.f90
- tracer/README
- tracer/messy_othersm.f90
- tracer/ptrac.nml-raw
- tracer/messy_main_tracer.f90
- tracer/tracer_bml.f90
- tracer/tracer.nml
- tracer/othersm.nml
- tracer/depend.mk.old
- tracer/ptrac.nml
- tracer/main.mk
- tracer/messy_ptrac.f90
- tracer/messy_main_tracer_family_si.f90
- tracer/sfmakedepend
- tracer/messy_main_tracer_family_e5.f90-raw
- tracer/copynml.sh
- tracer/messy_main_tools_si.f90
- tracer/lst2log.gawk
- tracer/messy_main_constants_mem.f90
- tracer/messy_main_mpi_si.f90
- tracer/messy_main_tracer_family.f90
- tracer/messy_main_data_si.f90
- tracer/messy_main_tools.f90
- tracer/Makefile.m
- tracer/messy_main_tracer_pdef_e5.f90-raw
- tracer/messy_ptrac_e5.f90-raw
- tracer/messy_main_tracer_bi.f90
- tracer-manual.pdf
