# Supplementary material for: Technical Note: Coupling of chemical processes with the Modular Earth Submodel System (MESSy) submodel TRACER
Source: Copernicus journal article supplement (doi:10.5194/acp-8-1677-2008), 2008-03-19
Supplement: Supplementary file 1 [file acp-8-1677-2008-supplement.zip › tracer-manual.pdf]

# MESSy TRACER User Manual

Patrick Jöckel, Astrid Kerkweg,  
Joachim Buchholz, Holger Tost, Rolf Sander &  
Andrea Pozzer

*for the MESSy TRACER submodel*

Air Chemistry Department  
Max-Planck Institute of Chemistry  
PO Box 3060, 55020 Mainz, Germany  
`joeckel@mpch-mainz.mpg.de`

This manual is part of the electronic supplement of our article “Technical note: Coupling of chemical processes with the Modular Earth Submodel System (MESSy) submodel TRACER” in *Atmos. Chem. Phys.* (2008), available at: <http://www.atmos-chem-phys.net>

Date: February 12, 2008

# Contents

|          |                                                                         |           |
|----------|-------------------------------------------------------------------------|-----------|
| <b>1</b> | <b>Introduction</b>                                                     | <b>3</b>  |
| <b>2</b> | <b>The meta-information structure</b>                                   | <b>3</b>  |
| <b>3</b> | <b>The file <code>messy_main_tracer.f90</code></b>                      | <b>4</b>  |
| 3.1      | Tracer set routines to be called from the BMIL . . . . .                | 4         |
| 3.1.1    | The subroutine <code>new_tracer_set</code> . . . . .                    | 4         |
| 3.1.2    | The subroutine <code>copy_tracer_set</code> . . . . .                   | 5         |
| 3.1.3    | The subroutine <code>setup_tracer_set</code> . . . . .                  | 5         |
| 3.1.4    | The subroutine <code>get_tracer_set</code> . . . . .                    | 5         |
| 3.1.5    | The subroutine <code>clean_tracer_set</code> . . . . .                  | 6         |
| 3.1.6    | The subroutine <code>print_tracer_set</code> . . . . .                  | 6         |
| 3.1.7    | The subroutine <code>print_tracer_set_val</code> . . . . .              | 6         |
| 3.1.8    | The subroutine <code>main_tracer_read_nml_ctrl</code> . . . . .         | 7         |
| 3.2      | Tracer routines to be called from the SMIL of MESSy submodels . . . . . | 7         |
| 3.2.1    | The subroutine <code>new_tracer</code> . . . . .                        | 7         |
| 3.2.2    | The subroutine <code>set_tracer</code> . . . . .                        | 8         |
| 3.2.3    | The subroutine <code>get_tracer</code> . . . . .                        | 8         |
| 3.2.4    | The subroutine <code>get_tracer_list</code> . . . . .                   | 9         |
| 3.2.5    | The subroutine <code>tracer_iniflag</code> . . . . .                    | 10        |
| 3.2.6    | The function <code>tracer_error_str</code> . . . . .                    | 10        |
| 3.2.7    | The function <code>param2string</code> . . . . .                        | 10        |
| 3.2.8    | The subroutine <code>full2base_sub</code> . . . . .                     | 11        |
| <b>4</b> | <b>A simple example application</b>                                     | <b>11</b> |
| <b>5</b> | <b>The file <code>messy_main_tracer_family.f90</code></b>               | <b>13</b> |
| 5.1      | The subroutine <code>tracer_family_read_nml_ctrl</code> . . . . .       | 13        |
| 5.2      | The subroutine <code>tracfamily_init</code> . . . . .                   | 13        |
| 5.3      | The subroutine <code>tracfamily_newtrac</code> . . . . .                | 13        |
| 5.4      | The subroutine <code>tracfamily_initmode</code> . . . . .               | 13        |
| 5.5      | The subroutine <code>tracfamily_meta</code> . . . . .                   | 13        |
| 5.6      | The subroutine <code>tracfamily_1_f2t</code> . . . . .                  | 14        |
| 5.7      | The subroutine <code>tracfamily_1_t2f</code> . . . . .                  | 14        |
| 5.8      | The subroutine <code>tracfamily_2_rsc</code> . . . . .                  | 14        |
| 5.9      | The subroutine <code>tracfamily_2_sum</code> . . . . .                  | 15        |
| 5.10     | The subroutine <code>tracfamily_freemem</code> . . . . .                | 15        |
| <b>6</b> | <b>The file <code>messy_main_tracer_pdef.f90</code></b>                 | <b>15</b> |
| 6.1      | The subroutine <code>tracer_pdef_read_nml_ctrl</code> . . . . .         | 15        |
| 6.2      | The subroutine <code>tracpdef_initmem</code> . . . . .                  | 15        |
| 6.3      | The subroutine <code>tracpdef_settings</code> . . . . .                 | 15        |
| 6.4      | The subroutine <code>tracpdef_airmass</code> . . . . .                  | 15        |
| 6.5      | The subroutine <code>tracpdef_integrate</code> . . . . .                | 16        |
| 6.6      | The subroutine <code>tracpdef_freemem</code> . . . . .                  | 16        |
| 6.7      | The subroutine <code>tracpdef_print</code> . . . . .                    | 16        |

## 1 Introduction

This documentation describes some more details of the MESSy submodel TRACER for the chemical coupling of processes in Earth System Models. Sect. 2 explains the tracer *meta-information* structure and how to expand it. A reference for the interface routines of the submodel follows. In most cases, the routines described in Sect. 3 are sufficient to apply TRACER. An example is illustrated in Sect. 4. The submodel core layer (SMCL) routines of the TRACER submodels TRACER.FAMILY and TRACER.PDEF are described in Sect. 5 and Sect. 6, respectively.

In the following description of the Fortran95 code, two parameters from the module `messy_main_constants_mem.f90` are used, one for the precision of real numbers:

```
INTEGER, PARAMETER :: DP = SELECTED_REAL_KIND(12,307)
```

and one for the length of strings:

```
INTEGER, PARAMETER :: STRLEN_MEDIUM = 24
```

The documented code is also part of the MESSy distribution version 1.5.

## 2 The meta-information structure

The *meta-information* of the tracers in a tracer set are stored in a concatenated list of Fortran95 structures:

```
TYPE t_trinfo_list
  TYPE(t_trinfo)          :: info
  TYPE(t_trinfo_list), POINTER :: next
END TYPE t_trinfo_list
```

The *meta-information* of one tracer is split into two parts:

```
TYPE t_trinfo
  TYPE(t_ident) :: ident      ! IDENTIFICATION
  TYPE(t_meta)  :: meta      ! ADDITIONAL META-INFORMATION
END TYPE t_trinfo
```

The first part (`t_ident`) is for the identification of the tracer and the second part (`t_meta`) to store additional *meta-information*. The tracer identification contains:

- a unique *fullname* consisting of a *basename* and an additional optional *subname*,
- the name of the submodel which has defined the tracer in the tracer set,
- a unique index, which is the number of the tracer in the tracer set that can also be used to address the corresponding *data*,
- the *medium* of the tracer; the following integer parameters are pre-defined: AIR=1, AEROSOL=2, CLOUD=3, OCEAN=4, LAKE=5, RIVER=6, LANDICE=7, SEAICE=8, VEGETATION=9,
- the *quantity* describing the abundance of the tracer; the following integer parameters are pre-defined: AMOUNT-FRACTION=1, NUMBERDENSITY=2, CONCENTRATION=3,
- the *unit* of the tracer *data*,
- the *type* of the tracer; the following integer parameters are pre-defined: SINGLE=0, FAMILY=1, ISOTOPE=2.

The additional *meta-information* contains one (logical) flag to store the initialisation state of the tracer *data* and three *meta-information* containers (Fortran95 arrays of rank one), for integer, real and string information, respectively. The meaning of a container content is solely defined by its position in the respective array (i.e., the container number); currently the following container numbers are pre-defined:

| container number  | value | meaning                                    | possible container content  |
|-------------------|-------|--------------------------------------------|-----------------------------|
| I_ADVECT          | 1     | switch for advection                       | <b>ON</b> , OFF             |
| I_CONVECT         | 2     | switch for convection                      | <b>ON</b> , OFF             |
| I_VDIFF           | 3     | switch for vertical diffusion              | <b>ON</b> , OFF             |
| I_WETDEP          | 4     | switch for wet deposition                  | ON, <b>OFF</b>              |
| I_DRYDEP          | 5     | switch for dry deposition                  | ON, <b>OFF</b>              |
| I_SEDI            | 6     | switch for sedimentation                   | ON, <b>OFF</b>              |
| I_SCAV            | 7     | switch for scavenging                      | ON, <b>OFF</b>              |
| I_MIX             | 8     | switch for turbulent mixing                | <b>ON</b> , OFF             |
| I_FORCE_COL       | 9     | switch for forcing in column mode          | ON, <b>OFF</b>              |
| I_INTEGRATE       | 10    | switch for time integration                | <b>ON</b> , OFF             |
| I_TIMEFILTER      | 11    | switch for time filter                     | <b>ON</b> , OFF             |
| I_FORCE_INIT      | 12    | switch for re-initialisation after restart | ON, <b>OFF</b>              |
| I_AEROSOL_METHOD  | 13    | method of aerosol dynamical model          | <b>MODAL</b> , BIN          |
| I_AEROSOL_MODE    | 14    | number of aerosol mode or bin              | (0)                         |
| I_AEROSOL_SOL     | 15    | aerosol solubility flag                    | <b>ON</b> , OFF             |
| R_MOLARMASS       | 1     | molar mass of species                      | (0.0) g/mol                 |
| R_HENRY           | 2     | effective henry's law coefficient          | (0.0) mol/L/atm             |
| R_DRYREAC_SF      | 3     | coefficient for dry reaction with surface  | e.g., <b>0.0</b> , 0.1, 1.0 |
| R_VINI            | 4     | initial value for tracer <i>data</i>       | (0.0)                       |
| R_AEROSOL_DENSITY | 5     | aerosol component density                  | (0.0)                       |
| S_AEROSOL_MODEL   | 1     | name of associated aerosol dynamical model |                             |

Text in bold-face or in parentheses shows the default values; OFF=0, ON=1, MODAL=2, and BIN=3 are pre-defined integer parameters. The container number names begin with “I”, “R\_” and “S\_” for integer, real and string containers, respectively.

To add new containers, the following steps are required (`messy_main_tracer.f90`, X is either I, R or S):

- add new container number parameter with `MAX_CASK_X + 1`
- increase `MAX_CASK_X` by one
- add descriptive string to `NAMES_CASK_X`
- add default container content to `DEFAULT_CASK_X`

### 3 The file `messy_main_tracer.f90`

The subroutines and functions in this file constitute the main interface routines for the application of TRACER from within a model. They are divided into two groups: the first group (to be called from the basemodel interface layer (BMIL)) to provide the overall framework for *tracer sets*, and the second group (to be called from the submodel interface layer (SMIL)) of MESSy submodels to handle individual *tracers*.

In the following description, the Fortran95 variable `status` defines an INTENT(OUT) variable of type INTEGER, which returns the status information of the respective subroutine. The `status` is 0, if the routine was successful, and > 0, if an error occurred. The value of `status` can be transformed by the function `tracer_error_str` into an error message.

#### 3.1 Tracer set routines to be called from the BMIL

##### 3.1.1 The subroutine `new_tracer_set`

The subroutine `new_tracer_set` defines a new tracer set and generates the *meta-information* framework for the set.

| SUBROUTINE new_tracer_set   |                  | (status ,setname ,l_enable) |                              |
|-----------------------------|------------------|-----------------------------|------------------------------|
| name                        | type             | intent                      | description                  |
| <b>mandatory arguments:</b> |                  |                             |                              |
| status                      | INTEGER          | OUT                         |                              |
| setname                     | CHARACTER(LEN=*) | IN                          | name of the tracer set       |
| l_enable                    | LOGICAL          | IN                          | enable or disable tracer set |

The name of a tracer set must be unique.

With the switch `l_enable` a tracer set can be enabled (`.TRUE.`) or disabled (`.FALSE.`) during the *initialisation phase* of the model simulation. Depending on the model setup, not all available (=defined) tracer sets might be always enabled. The routines accessing tracers (Sect. 3.2) of disabled tracer sets will always return `status=0`.

### 3.1.2 The subroutine copy\_tracer\_set

The subroutine `copy_tracer_set` copies the *meta-information* of a complete tracer set (including the *meta-information* of its tracers) into a new tracer set.

| SUBROUTINE copy_tracer_set  |                  | (status ,oldset ,newset) |                                     |
|-----------------------------|------------------|--------------------------|-------------------------------------|
| name                        | type             | intent                   | description                         |
| <b>mandatory arguments:</b> |                  |                          |                                     |
| status                      | INTEGER          | OUT                      |                                     |
| oldset                      | CHARACTER(LEN=*) | IN                       | name of the tracer set to be copied |
| newset                      | CHARACTER(LEN=*) | IN                       | name of the new tracer set          |

This can be used to specify tracer sets, which are identical w.r.t. their tracer *meta-information*, however, different w.r.t. their *representation*, e.g., tracer sets with different grid structures.

### 3.1.3 The subroutine setup\_tracer\_set

The subroutine `setup_tracer_set` allocates memory for a tracer set.

| SUBROUTINE setup_tracer_set |                       | (status ,setname ,dim ,nt ,l_tfstd ,l_init) |                                                   |
|-----------------------------|-----------------------|---------------------------------------------|---------------------------------------------------|
| name                        | type                  | intent                                      | description                                       |
| <b>mandatory arguments:</b> |                       |                                             |                                                   |
| status                      | INTEGER               | OUT                                         |                                                   |
| setname                     | CHARACTER(LEN=*)      | IN                                          | name of the tracer set                            |
| dim                         | INTEGER, DIMENSION(3) | IN                                          | <i>representation</i> dimension lengths           |
| nt                          | INTEGER               | IN                                          | number of <i>data instances</i>                   |
| l_tfstd                     | LOGICAL               | IN                                          | <code>.TRUE.</code> for standard <i>instances</i> |
| l_init                      | LOGICAL               | IN                                          | initialisation protector                          |

Up to three dimensions (`dim`) can be used to associate a *representation* (e.g., a 3-dimensional spatial grid) to a tracer set. If the *representation* is less than 3-dimensional, the remaining dimension lengths must be set to 1.

The number of *data instances* is usually used for different stages of the time integration scheme (e.g., leap-frog with filter). In case `nt` is 3 or larger, the switch `l_tfstd` (`=.TRUE.`) associates a special meaning to the first three instances, namely the tracer *data* at time step  $t$ , the tracer tendency, and the tracer *data* at time step  $t - \Delta t$ , respectively ( $\Delta t$  is the model time step length).

The switch `l_init` (`=.FALSE.`) can be used to protect the tracer *data* of all tracers in this set from potential tracer initialisation procedures during the *initialisation phase* of the model (in the BMIL).

### 3.1.4 The subroutine get\_tracer\_set

The subroutine `get_tracer_set` sets references to tracer sets.

| SUBROUTINE <code>get_tracer_set</code> |                                 | (status [,setid] [,setname] [,trlist] [,ti]<br>[,ntrac] [,xt] [,xtte] [,xtm1] [,xmem]<br>[,l_tfstd] [,l_init] [,l_enable]) |                               |
|----------------------------------------|---------------------------------|----------------------------------------------------------------------------------------------------------------------------|-------------------------------|
| name                                   | type                            | intent                                                                                                                     | description                   |
| <b>mandatory arguments:</b>            |                                 |                                                                                                                            |                               |
| status                                 | INTEGER                         | OUT                                                                                                                        |                               |
| <b>optional arguments:</b>             |                                 |                                                                                                                            |                               |
| setid <sup>*)</sup>                    | INTEGER                         | IN                                                                                                                         | id of tracer set              |
| setname <sup>*)</sup>                  | CHARACTER(LEN=*)                | IN <sup>*)</sup>                                                                                                           | name of the tracer set        |
| trlist                                 | TYPE(t_trinfo_list)             | POINTER                                                                                                                    | <i>meta-information</i> list  |
| ti                                     | TYPE(t_trinfo_tp), DIMENSION(:) | POINTER                                                                                                                    | <i>meta-information</i> array |
| ntrac                                  | INTEGER                         | OUT                                                                                                                        | number of tracers in set      |
| xt                                     | REAL(DP), DIMENSION(:,:,:,:)    | POINTER                                                                                                                    | 1st <i>instance</i>           |
| xtte                                   | REAL(DP), DIMENSION(:,:,:,:)    | POINTER                                                                                                                    | 2nd <i>instance</i>           |
| xtm1                                   | REAL(DP), DIMENSION(:,:,:,:)    | POINTER                                                                                                                    | 3rd <i>instance</i>           |
| xmem                                   | REAL(DP), DIMENSION(:,:,:,:)    | POINTER                                                                                                                    | > 3 or all <i>instances</i>   |
| l_tfstd                                | LOGICAL                         | OUT                                                                                                                        | standard <i>instances</i> ?   |
| l_init                                 | LOGICAL                         | OUT                                                                                                                        | initialisation protector ?    |
| l_enable                               | LOGICAL                         | OUT                                                                                                                        | enabled or disabled ?         |

<sup>\*)</sup>Note: If `setid` is present, `setname` is optional and INTENT(OUT). Otherwise, `setname` is mandatory and INTENT(IN).

`trlist` returns the tracer *meta-information* as a concatenated list of Fortran95 pointer structures, whereas `ti` returns the same information as 1-dimensional array with the *tracer index* as array index.

The total number of tracers defined in the set by all submodels (with the routine `new_tracer`) is `ntrac`.

`xt`, `xtte`, `xtm1` and `xmem` are pointers to the *data* memory. `xt` always points to the first *data instance*. In case `l_tfstd` is not set (=FALSE.), or the number of *instances* is less than three, `xtte` and `xtm1` are nullified pointers, and `xmem` points to all *instances* > 1. In case `l_tfstd` is .TRUE. and the number of *instances* is three or larger, `xt`, `xtte` and `xtm1` point to *instances* 1 to 3 respectively, and `xmem` to all *instances* > 3 (if available; otherwise the pointer is nullified).

The initialisation protector and the activity status (enabled or disabled) of the tracer set can be retrieved with `l_init` and `l_enable`, respectively.

### 3.1.5 The subroutine `clean_tracer_set`

The subroutine `clean_tracer_set` removes a tracer set from memory.

| SUBROUTINE <code>clean_tracer_set</code> |                  | (status ,setname) |                        |
|------------------------------------------|------------------|-------------------|------------------------|
| name                                     | type             | intent            | description            |
| <b>mandatory arguments:</b>              |                  |                   |                        |
| status                                   | INTEGER          | OUT               |                        |
| setname                                  | CHARACTER(LEN=*) | IN                | name of the tracer set |

The *data* memory of the tracer set is deallocated and the *meta-information* of all tracers in the tracer set are deleted.

### 3.1.6 The subroutine `print_tracer_set`

The subroutine `print_tracer_set` prints a summary of all tracer sets (tracer *meta-information* only).

| SUBROUTINE <code>print_tracer_set</code> | ( ) |
|------------------------------------------|-----|
|------------------------------------------|-----|

This routine can be used to output the tracer meta-information of all tracer sets after the initialisation or for debugging.

### 3.1.7 The subroutine `print_tracer_set_val`

The subroutine `print_tracer_set_val` prints the range of tracer *data* values (all *instances*) of all tracers in all tracer sets.

|                                 |     |
|---------------------------------|-----|
| SUBROUTINE print_tracer_set_val | ( ) |
|---------------------------------|-----|

This routine can be used to output the tracer information of all tracer sets after the tracer sets have been set up, or for debugging.

### 3.1.8 The subroutine main\_tracer\_read\_nml\_ctrl

The subroutine `main_tracer_read_nml_ctrl` reads the tracer CTRL namelist, checks it, and initialises global variables.

|                                      |         |               |                      |
|--------------------------------------|---------|---------------|----------------------|
| SUBROUTINE main_tracer_read_nml_ctrl |         | (status ,iou) |                      |
| name                                 | type    | intent        | description          |
| <b>mandatory arguments:</b>          |         |               |                      |
| status                               | INTEGER | OUT           |                      |
| iou                                  | INTEGER | IN            | Fortran95 input unit |

## 3.2 Tracer routines to be called from the SMIL of MESSy submodels

### 3.2.1 The subroutine new\_tracer

The subroutine `new_tracer` defines a new tracer in a set and optionally sets the tracer *meta-information*.

|                             |                                                     |                                                                                                                                          |                                           |
|-----------------------------|-----------------------------------------------------|------------------------------------------------------------------------------------------------------------------------------------------|-------------------------------------------|
| SUBROUTINE new_tracer       |                                                     | (status ,setname ,basename ,submodel [,idx] [,subname] [,longname] [,unit] [,medium] [,quantity] [,type] [,cask_i] [,cask_r], [,cask_s]) |                                           |
| name                        | type                                                | intent                                                                                                                                   | description                               |
| <b>mandatory arguments:</b> |                                                     |                                                                                                                                          |                                           |
| status                      | INTEGER                                             | OUT                                                                                                                                      |                                           |
| setname                     | CHARACTER(LEN=*)                                    | IN                                                                                                                                       | name of the tracer set                    |
| basename                    | CHARACTER(LEN=*)                                    | IN                                                                                                                                       | basename of the tracer                    |
| submodel                    | CHARACTER(LEN=*)                                    | IN                                                                                                                                       | name of submodel which defines the tracer |
| <b>optional arguments:</b>  |                                                     |                                                                                                                                          |                                           |
| idx                         | INTEGER                                             | OUT                                                                                                                                      | index of tracer in tracer set             |
| subname                     | CHARACTER(LEN=*)                                    | IN                                                                                                                                       | subname of the tracer                     |
| longname                    | CHARACTER(LEN=*)                                    | IN                                                                                                                                       | string for more information               |
| unit                        | CHARACTER(LEN=*)                                    | IN                                                                                                                                       | unit of the tracer <i>data</i>            |
| medium                      | INTEGER                                             | IN                                                                                                                                       | medium of the tracer                      |
| quantity                    | INTEGER                                             | IN                                                                                                                                       | quantity of the tracer                    |
| type                        | INTEGER                                             | IN                                                                                                                                       | type of the tracer                        |
| cask_i                      | INTEGER, DIMENSION(MAX_CASK_I)                      | IN                                                                                                                                       | integer values                            |
| cask_r                      | INTEGER, DIMENSION(MAX_CASK_R)                      | IN                                                                                                                                       | real values                               |
| cask_s                      | CHARACTER(LEN=STRLEN_MEDIUM), DIMENSION(MAX_CASK_S) | IN                                                                                                                                       | string values                             |

The minimum necessary information to define a new tracer in a tracer set is the **basename** of the tracer and the name of the **submodel** which defines the tracer. The **basename** must not contain any underscore (“\_”). The **basename** can optionally be supplemented by a **subname**. The tracer within a set is identified by its unique **fullname**, which is the **basename**, if the **subname** is empty, or the **basename** followed by an underscore (“\_”) followed by the **subname**. The **unit** specifies the unit of the corresponding tracer *data*. The **longname** can be used for an extended description of the species. **medium**, **quantity** and **type** of the tracer can be specified, if the default values (AIR, AMOUNTFRACTION, SINGLE) are not appropriate. With the three containers **cask\_i**, **cask\_r**, and **cask\_s** the additional *meta-information* can be specified, e.g., with the following sequence:

```
...
USE messy_main_tracer, ONLY: new_tracer, MAX_CASK_I, DEFAULT_CASK_I, OFF &
                             , MAX_CASK_R, DEFAULT_CASK_R, R_MOLARMASS &
                             , I_ADVECTION
...
```

```

INTEGER, DIMENSION(MAX_CASK_I) :: MY_CASK_I
REAL(DP), DIMENSION(MAX_CASK_R) :: MY_CASK_R
...
MY_CASK_I(:) = DEFAULT_CASK_I(:)
MY_CASK_R(:) = DEFAULT_CASK_R(:)
MY_CASK_I(I_ADVECTION) = OFF
MY_CASK_R(R_MOLARMASS) = 30.0_dp
...
CALL new_tracer(status, setname, basename           &
               , cask_i=MY_CASK_I, cask_r=_MY_CASK_R)
...

```

The index `idx` of the tracer in the set can optionally be retrieved for further application with the subroutine `set_tracer`, and / or for addressing the corresponding tracer *data* memory.

### 3.2.2 The subroutine `set_tracer`

The subroutine `set_tracer` specifies the meta-information of a tracer in a tracer set.

| SUBROUTINE <code>set_tracer</code> |                              | (status ,setname ,idx, flag , i   r   s) |                               |
|------------------------------------|------------------------------|------------------------------------------|-------------------------------|
| name                               | type                         | intent                                   | description                   |
| <b>mandatory arguments:</b>        |                              |                                          |                               |
| <code>status</code>                | INTEGER                      | OUT                                      |                               |
| <code>setname</code>               | CHARACTER(LEN=*)             | IN                                       | name of the tracer set        |
| <code>idx</code>                   | INTEGER                      | IN                                       | index of tracer in tracer set |
| <code>flag</code>                  | INTEGER                      | IN                                       | container number              |
| <code>i</code> *)                  | INTEGER                      | IN                                       | integer container content     |
| <code>r</code> *)                  | REAL(DP)                     | IN                                       | real container content        |
| <code>s</code> *)                  | CHARACTER(LEN=STRLEN_MEDIUM) | IN                                       | string container content      |

\*)Note: This subroutine is threefoldly overloaded for integer, real and string values respectively.

With each call to this subroutine one specific meta-information container can be filled. The corresponding tracer is identified by the name of the tracer set and the index of the tracer in the tracer set, e.g.:

```

...
USE messy_main_tracer, ONLY: set_tracer, R_MOLARMASS
...
CALL set_tracer(status, setname, idx, R_molarmass, 30.0_dp)
...

```

The index can be retrieved from the call to the subroutine `new_tracer`.

### 3.2.3 The subroutine `get_tracer`

The subroutine `get_tracer` retrieves information about a tracer in a tracer set.

| SUBROUTINE <code>get_tracer</code> |                                 | (status, setname, basename [, subname] [, idx]<br>[, fullname] [, longname] [, unit] [, submodel]<br>[, medium] [, quantity] [, type] [, trinfo]<br>[, pxt] [, pxtm1] [, pxtte] [, pxmem]) |                                             |
|------------------------------------|---------------------------------|--------------------------------------------------------------------------------------------------------------------------------------------------------------------------------------------|---------------------------------------------|
| name                               | type                            | intent                                                                                                                                                                                     | description                                 |
| <b>mandatory arguments:</b>        |                                 |                                                                                                                                                                                            |                                             |
| status                             | INTEGER                         | OUT                                                                                                                                                                                        |                                             |
| setname                            | CHARACTER(LEN=*)                | IN                                                                                                                                                                                         | name of the tracer set                      |
| basename                           | CHARACTER(LEN=*)                | IN                                                                                                                                                                                         | basename of the tracer                      |
| <b>optional arguments:</b>         |                                 |                                                                                                                                                                                            |                                             |
| subname                            | CHARACTER(LEN=*)                | IN                                                                                                                                                                                         | subname of the tracer                       |
| idx                                | INTEGER                         | OUT                                                                                                                                                                                        | index of tracer in tracer set               |
| fullname                           | CHARACTER(LEN=*)                | OUT                                                                                                                                                                                        | fullname of the tracer                      |
| longname                           | CHARACTER(LEN=*)                | OUT                                                                                                                                                                                        | string information about the tracer         |
| unit                               | CHARACTER(LEN=*)                | OUT                                                                                                                                                                                        | unit of the tracer <i>data</i>              |
| submodel                           | CHARACTER(LEN=*)                | OUT                                                                                                                                                                                        | name of submodel which defined the tracer   |
| medium                             | INTEGER                         | OUT                                                                                                                                                                                        | medium of the tracer                        |
| quantity                           | INTEGER                         | OUT                                                                                                                                                                                        | quantity of the tracer                      |
| type                               | INTEGER                         | OUT                                                                                                                                                                                        | type of the tracer                          |
| trinfo                             | TYPE(t_trinfo)                  | OUT                                                                                                                                                                                        | <i>meta-information</i> structure           |
| pxt                                | REAL(DP), DIMENSION(:, :, :)    | POINTER                                                                                                                                                                                    | pointer to tracer memory ( <i>t</i> )       |
| pxtm1                              | REAL(DP), DIMENSION(:, :, :)    | POINTER                                                                                                                                                                                    | pointer to tracer memory ( $t - \Delta t$ ) |
| pxtte                              | REAL(DP), DIMENSION(:, :, :)    | POINTER                                                                                                                                                                                    | pointer to tracer memory (tendency)         |
| pxmem                              | REAL(DP), DIMENSION(:, :, :, :) | POINTER                                                                                                                                                                                    | pointer to additional memory instances      |

Knowing the **basename** (and optional **subname**) of the tracer, the *meta-information* of the tracer in the set can be retrieved and local pointers to the corresponding tracer *data* memory can be set. The **fullname** is the **basename**, if the **subname** is empty, or the **basename** followed by an underscore (“\_”) and the **subname**. The structure **trinfo** contains (a copy of) the *meta-information* of the tracer (see Sect. 2). The following example shows how to access it:

```

...
USE messy_main_tracer, ONLY: get_tracer, t_trinfo, R_molarmass
...
TYPE(t_trinfo) :: ti
...
CALL get_tracer(status, setname, basename, trinfo=ti)
...
WRITE(*,*) "The molar mass is :", ti%info%meta%cas_k_R(R_molarmass)
...

```

The pointers **pxt**, **pxtm1** and **pxtte** point to the *instances* corresponding to the tracer *data* at model time step  $t$ ,  $t - \Delta t$ , and to the tracer tendency, respectively, if the tracer set has been set up (subroutine **setup\_tracer\_set**) with three or more *instances* and **l\_tfstd** = .TRUE.. In this case, **pxmem** points to all remaining *instances*, or causes **status** > 0, if only three *instances* are defined. If the tracer set has been setup in a different way, accessing **pxtm1** and / or **pxtte** will result in a **status** > 0. Accessing **pxmem**, if only one instance has been defined, will also result in **status** > 0.

It is highly recommended to test the **status** of this routine after it has been called.

### 3.2.4 The subroutine `get_tracer_list`

The subroutine `get_tracer_list` retrieves the tracer indices of all tracers with the same **basename** from a tracer set.

| SUBROUTINE <code>get_tracer_list</code> |                                               | (status ,setname ,basename ,idxs [,subnames]) |                        |
|-----------------------------------------|-----------------------------------------------|-----------------------------------------------|------------------------|
| name                                    | type                                          | intent                                        | description            |
| <b>mandatory arguments:</b>             |                                               |                                               |                        |
| status                                  | INTEGER                                       | OUT                                           |                        |
| setname                                 | CHARACTER(LEN=*)                              | IN                                            | name of the tracer set |
| basename                                | CHARACTER(LEN=*)                              | IN                                            | basename of the tracer |
| idxs                                    | INTEGER, DIMENSION(:)                         | POINTER                                       | tracer indices         |
| <b>optional arguments:</b>              |                                               |                                               |                        |
| subnames                                | CHARACTER(LEN=STRLEN_MEDIUM),<br>DIMENSION(:) | POINTER                                       | tracer subnames        |

Optionally, the `subnames` of all tracers with the specified `basename` can be retrieved. The two pointers will be allocated with the number of tracers found ( $\geq 0$ ).

### 3.2.5 The subroutine `tracer_iniflag`

The subroutine `tracer_iniflag` sets the initialisation flag.

| SUBROUTINE <code>tracer_iniflag</code> |                  | (status ,setname ,id ,linit) |                               |
|----------------------------------------|------------------|------------------------------|-------------------------------|
| name                                   | type             | intent                       | description                   |
| <b>mandatory arguments:</b>            |                  |                              |                               |
| status                                 | INTEGER          | OUT                          |                               |
| setname                                | CHARACTER(LEN=*) | IN                           | name of the tracer set        |
| id                                     | INTEGER          | IN                           | index of tracer in tracer set |
| linit                                  | LOGICAL          | IN                           | initialisation state          |

`linit=.TRUE.` means the tracer *data* is initialised.

### 3.2.6 The function `tracer_error_str`

The function `tracer_error_str` returns status information.

| CHARACTER(LEN=STRLEN_VLONG) FUNCTION <code>tracer_error_str</code> (status) |         |        |             |
|-----------------------------------------------------------------------------|---------|--------|-------------|
| name                                                                        | type    | intent | description |
| <b>mandatory arguments:</b>                                                 |         |        |             |
| status                                                                      | INTEGER | IN     |             |

The error status is converted into a meaningful message.

### 3.2.7 The function `param2string`

The function `param2string` converts a parameter to a string.

| CHARACTER(LEN=STRLEN_MEDIUM) FUNCTION <code>param2string</code> (i ,mode) |                  |        |             |
|---------------------------------------------------------------------------|------------------|--------|-------------|
| name                                                                      | type             | intent | description |
| <b>mandatory arguments:</b>                                               |                  |        |             |
| i                                                                         | INTEGER          | IN     |             |
| mode                                                                      | CHARACTER(LEN=*) | IN     |             |

With this information tracer *meta-information* can be converted to strings, e.g., to generate readable output or attributes. Four modes are available: 'switch', 'type', 'medium', and 'quantity'. An application sequence is for example:

```
...
CALL get_tracer(status, setname, basename, trinfo=ti)
str = param2string(ti%meta%ident%medium, 'medium')
! will return 'AIR', or 'AEROSOL', or ...
...
CALL get_tracer(status, setname, basename, trinfo=ti)
str = param2string(ti%meta%cask_i(I_ADVECTION), 'switch')
! will return 'ON', or 'OFF'
...
```

### 3.2.8 The subroutine full2base\_sub

The subroutine `full2base_sub` converts a fullname to basename and subname.

| SUBROUTINE <code>full2base_sub</code> |                  | <code>(status ,fullname ,basename ,subname)</code> |                        |
|---------------------------------------|------------------|----------------------------------------------------|------------------------|
| name                                  | type             | intent                                             | description            |
| <b>mandatory arguments:</b>           |                  |                                                    |                        |
| <code>status</code>                   | INTEGER          | OUT                                                |                        |
| <code>fullname</code>                 | CHARACTER(LEN=*) | IN                                                 | fullname of the tracer |
| <code>basename</code>                 | CHARACTER(LEN=*) | OUT                                                | basename of the tracer |
| <code>subname</code>                  | CHARACTER(LEN=*) | OUT                                                | subname of the tracer  |

## 4 A simple example application

A typical sequence of calls during the three phases of a model simulation is provided in `tracer_bml.f90`, an example basemodel (BML) and its base model interface layer (BMIL) `messy_main_tracer_bi.f90`. For the implementation of TRACER into a specific model, it is recommended to modify and use `messy_main_tracer_bi.f90`, since it contains also correct calls to the TRACER submodels `TRACER.FAMILY` and `TRACER.PDEF`, and further provides a high-level interface for the tracer-family conversion.

### INITIALISATION PHASE

- `bml_initialize`: initialise base model
- `main_tracer_initialize`
  - `main_tracer_read_nml_ctrl`: read CTRL namelist and set switches
  - `main_tracer_family_initialize`:
    - \* `tracer_family_read_nml_ctrl`: read CTRL.FAMILY namelist and set switches
  - `main_tracer_pdef_initialize`:
    - \* `tracer_pdef_read_nml_ctrl`: read CTRL.PDEF namelist and set switches
- initialise MESSy submodels
- `main_tracer_new_tracer(1)`
  - `new_tracer_set`: define new tracer set(s)
- add tracers by MESSy submodels with `new_tracer`
- `main_tracer_new_tracer(2)`
  - `main_tracer_family_new_tracer`: define tracer families according to CTRL.FAMILY namelist
- `main_tracer_new_tracer(3)`
  - `print_tracer_set`: diagnostic output
- `main_tracer_init_memory(1)`
  - `setup_tracer_set`: fixate meta-information and allocate data memory
  - `get_tracer_set`: set pointers to tracer set data memory
- setup memory of MESSy submodels
- `main_tracer_init_memory(2)`
  - `main_tracer_pdef_init_mem`: additional memory for TRACER.PDEF
  - `main_tracer_family_init_mem`: set meta information of family-members to fraction

- `main_tracer_init_coupling`
  - `main_tracer_family_init_cpl`: reset meta information of family-members
  - `main_tracer_pdef_init_cpl`: fixate settings of TRACER\_PDEF
- coupling of MESSy submodels with `get_tracer`
- `main_tracer_init_tracer(1)`: check initialisation after restart
- initialise tracers via MESSy submodels
- `main_tracer_init_tracer(2)`: check initialisation state; initialise with constant
- `main_tracer_init_tracer(3)`
  - `print_tracer_set_val`: diagnostic output

## TIME INTEGRATION PHASE

- `main_tracer_global_start(1)`
  - `main_tracer_pdef_global_start`: set trigger
- global\_start of MESSy submodels
- `main_tracer_global_start(2)`
  - `main_tracer_family_global_start`:
    - \* `tracfamily_2_sum`: conversion of type-2 families into family mode (summation)
    - \* `tracfamily_1_t2f`: conversion of type-1 families into family mode
- processes in family mode; e.g., advection
- `main_tracer_afteradv`
  - `main_tracer_family_afteradv`
    - \* `tracfamily_1_f2t`: conversion of type-1 families into tracer mode
    - \* `tracfamily_2_rsc`: conversion of type-2 families into tracer mode (rescaling)
- `main_tracer_fconv_glb`: optional family conversion
- ... START LOOP OVER OUTER RANK IN REPRESENTATION
- `main_tracer_local_start`: set pointers (reduced in rank) to data memory
- `main_tracer_fconv_loc`: optional family conversion
- ... END LOOP OVER OUTER RANK IN REPRESENTATION
- `main_tracer_global_end`
  - `tracpdef_airmass`: set tracer set (representation) specific airmass for global tracer mass integration
  - `main_tracer_pdef_global_end`: global tracer mass integration
- output of results

## FINALISING PHASE

- `main_tracer_free_memory`
  - `clean_tracer_set`
  - `main_tracer_pdef_free_mem`
  - `main_tracer_family_free_mem`

## 5 The file messy\_main\_tracer\_family.f90

### 5.1 The subroutine tracer\_family\_read\_nml\_ctrl

The subroutine `tracer_family_read_nml_ctrl` reads the CTRL\_FAMILY namelist.

| SUBROUTINE <code>tracer_family_read_nml_ctrl</code> |         | (status ,iou) |                      |
|-----------------------------------------------------|---------|---------------|----------------------|
| name                                                | type    | intent        | description          |
| <b>mandatory arguments:</b>                         |         |               |                      |
| status                                              | INTEGER | OUT           |                      |
| iou                                                 | INTEGER | IN            | Fortran95 input unit |

### 5.2 The subroutine tracfamily\_init

The subroutine `tracfamily_init` processes the information read from the CTRL\_FAMILY namelist.

| SUBROUTINE <code>tracfamily_init</code> |         | (status) |             |
|-----------------------------------------|---------|----------|-------------|
| name                                    | type    | intent   | description |
| <b>mandatory arguments:</b>             |         |          |             |
| status                                  | INTEGER | OUT      |             |

### 5.3 The subroutine tracfamily\_newtrac

The subroutine `tracfamily_newtrac` defines new tracers (for the families) according to the CTRL\_FAMILY namelist.

| SUBROUTINE <code>tracfamily_newtrac</code> |         | (status ,ldiagout) |                     |
|--------------------------------------------|---------|--------------------|---------------------|
| name                                       | type    | intent             | description         |
| <b>mandatory arguments:</b>                |         |                    |                     |
| status                                     | INTEGER | OUT                |                     |
| ldiagout                                   | LOGICAL | IN                 | diagnostic output ? |

The first valid tracer in a list of family members determines the *meta-information* of the family tracer. Tracers which are not defined, tracers which are already a member of another family (except for members of type-2 families without rescaling), empty families and families with the same name as already defined tracers are ignored.

### 5.4 The subroutine tracfamily\_initmode

The subroutine `tracfamily_initmode` initialises the internal mode as tracer mode.

| SUBROUTINE <code>tracfamily_initmode</code> |  | () |  |
|---------------------------------------------|--|----|--|
|---------------------------------------------|--|----|--|

### 5.5 The subroutine tracfamily\_meta

The subroutine `tracfamily_meta` converts the *meta-information* for type-1 families and their members between tracer mode and family mode in both directions.

| SUBROUTINE <code>tracfamily_meta</code> |                  | (status ,flag ,callstr ,setname ,ldiagout) |                                                                |
|-----------------------------------------|------------------|--------------------------------------------|----------------------------------------------------------------|
| name                                    | type             | intent                                     | description                                                    |
| <b>mandatory arguments:</b>             |                  |                                            |                                                                |
| status                                  | INTEGER          | OUT                                        |                                                                |
| flag                                    | INTEGER          | IN                                         | 1: conversion into tracer mode; 2: conversion into family mode |
| callstr                                 | CHARACTER(LEN=*) | IN                                         | name of calling routine                                        |
| setname                                 | CHARACTER(LEN=*) | IN                                         | name of the tracer set                                         |
| ldiagout                                | LOGICAL          | IN                                         | diagnostic output ?                                            |

## 5.6 The subroutine tracfamily\_1.f2t

The subroutine `tracfamily_1.f2t` converts type-1 families into the tracer mode (Eqs. (12)-(14)).

| SUBROUTINE tracfamily_1.f2t |                  | (status ,callstr ,p_pe ,setname ,ztmst ,jjrow<br>[,ksize] [,ltesubst]) |                                       |
|-----------------------------|------------------|------------------------------------------------------------------------|---------------------------------------|
| name                        | type             | intent                                                                 | description                           |
| <b>mandatory arguments:</b> |                  |                                                                        |                                       |
| status                      | INTEGER          | OUT                                                                    |                                       |
| callstr                     | CHARACTER(LEN=*) | IN                                                                     | name of calling routine               |
| p_pe                        | INTEGER          | IN                                                                     | *)                                    |
| setname                     | CHARACTER(LEN=*) | IN                                                                     | name of the tracer set                |
| ztmst                       | REAL(DP)         | IN                                                                     | model time step length ( $\Delta t$ ) |
| jjrow                       | INTEGER          | IN                                                                     | *)                                    |
| <b>optional arguments:</b>  |                  |                                                                        |                                       |
| ksize                       | INTEGER          | IN                                                                     | size of 1st data rank                 |

\*)Note: `p_pe` and `jjrow` are used for restricting diagnostic output (`l_verbose=.TRUE.` in `CTRL_FAMILY` namelist) to only one task (`i_diag_pe` in `CTRL_FAMILY` namelist) in a parallel environment and to only one row (`i_diag_jrow` in `CTRL_FAMILY` namelist) along the 3rd rank of the data representation.

## 5.7 The subroutine tracfamily\_1.t2f

The subroutine `tracfamily_1.t2f` converts type-1 families into the family mode (Eqs. (3)-(5), (7)-(9) and (10)).

| SUBROUTINE tracfamily_1.t2f |                  | (status ,callstr ,p_pe ,setname ,ztmst ,jjrow<br>[,ksize] [,l_frac]) |                                       |
|-----------------------------|------------------|----------------------------------------------------------------------|---------------------------------------|
| name                        | type             | intent                                                               | description                           |
| <b>mandatory arguments:</b> |                  |                                                                      |                                       |
| status                      | INTEGER          | OUT                                                                  |                                       |
| callstr                     | CHARACTER(LEN=*) | IN                                                                   | name of calling routine               |
| p_pe                        | INTEGER          | IN                                                                   | *)                                    |
| setname                     | CHARACTER(LEN=*) | IN                                                                   | name of the tracer set                |
| ztmst                       | REAL(DP)         | IN                                                                   | model time step length ( $\Delta t$ ) |
| jjrow                       | INTEGER          | IN                                                                   | *)                                    |
| <b>optional arguments:</b>  |                  |                                                                      |                                       |
| ksize                       | INTEGER          | IN                                                                   | size of 1st data rank                 |
| l_frac                      | LOGICAL          | IN                                                                   | calculate fractions ?                 |

\*)Note: `p_pe` and `jjrow` are used for restricting diagnostic output (`l_verbose=.TRUE.` in `CTRL_FAMILY` namelist) to only one task (`i_diag_pe` in `CTRL_FAMILY` namelist) in a parallel environment and to only one row (`i_diag_jrow` in `CTRL_FAMILY` namelist) along the 3rd rank of the data representation.

The optional switch `l_frac=.FALSE.` (default: `.TRUE.`) is used to restrict the conversion only to the summation of the families (i.e., Eqs. (3)-(5)), omitting the calculation of the fractions (Eqs. (7)-(9)) and the storage (Eq. (10)). This is used to update the family tracers just before the model output.

## 5.8 The subroutine tracfamily\_2.rsc

The subroutine `tracfamily_2.rsc` converts type-2 families into the tracer mode (rescaling of the tracers, Eqs.(15)-(17)).

| SUBROUTINE tracfamily_2.rsc |                  | (setname ,ztmst ,jjrow) |                                       |
|-----------------------------|------------------|-------------------------|---------------------------------------|
| name                        | type             | intent                  | description                           |
| <b>mandatory arguments:</b> |                  |                         |                                       |
| setname                     | CHARACTER(LEN=*) | IN                      | name of the tracer set                |
| ztmst                       | REAL(DP)         | IN                      | model time step length ( $\Delta t$ ) |
| jjrow                       | INTEGER          | IN                      | row along 3rd rank of data            |

## 5.9 The subroutine tracfamily\_2\_sum

The subroutine `tracfamily_2_sum` converts type-2 families into the family mode (summation, Eqs. (3)-(5)).

| SUBROUTINE <code>tracfamily_2_sum</code> |                  | (setname ,jjrow) |                            |
|------------------------------------------|------------------|------------------|----------------------------|
| name                                     | type             | intent           | description                |
| <b>mandatory arguments:</b>              |                  |                  |                            |
| setname                                  | CHARACTER(LEN=*) | IN               | name of the tracer set     |
| jjrow                                    | INTEGER          | IN               | row along 3rd rank of data |

## 5.10 The subroutine tracfamily\_freemem

The subroutine `tracfamily_freemem` deallocates the additional memory used to store information for tracer families.

| SUBROUTINE <code>tracfamily_freemem</code> |  | () |  |
|--------------------------------------------|--|----|--|
|--------------------------------------------|--|----|--|

# 6 The file messy\_main\_tracer\_pdef.f90

## 6.1 The subroutine tracer\_pdef\_read\_nml\_ctrl

The subroutine `tracer_pdef_read_nml_ctrl` reads the CTRL\_PDEF namelist.

| SUBROUTINE <code>tracer_pdef_read_nml_ctrl</code> |         | (status ,iou) |                      |
|---------------------------------------------------|---------|---------------|----------------------|
| name                                              | type    | intent        | description          |
| <b>mandatory arguments:</b>                       |         |               |                      |
| status                                            | INTEGER | OUT           |                      |
| iou                                               | INTEGER | IN            | Fortran95 input unit |

## 6.2 The subroutine trapcdef\_initmem

The subroutine `trapcdef_initmem` allocates and initialises the required memory.

| SUBROUTINE <code>trapcdef_initmem</code> |         | (nprocs) |                                              |
|------------------------------------------|---------|----------|----------------------------------------------|
| name                                     | type    | intent   | description                                  |
| <b>mandatory arguments:</b>              |         |          |                                              |
| nprocs                                   | INTEGER | IN       | number of processors in parallel environment |

## 6.3 The subroutine trapcdef\_settings

The subroutine `trapcdef_settings` processes the information read from the CTRL\_PDEF namelist.

| SUBROUTINE <code>trapcdef_settings</code> |         | (ldiagout) |                     |
|-------------------------------------------|---------|------------|---------------------|
| name                                      | type    | intent     | description         |
| <b>mandatory arguments:</b>               |         |            |                     |
| ldiagout                                  | LOGICAL | IN         | diagnostic output ? |

## 6.4 The subroutine trapcdef\_airmass

The subroutine `trapcdef_airmass` sets the airmass used for the tracer mass integration.

| SUBROUTINE <code>trapcdef_airmass</code> |                              | (setname ,airmass) |                        |
|------------------------------------------|------------------------------|--------------------|------------------------|
| name                                     | type                         | intent             | description            |
| <b>mandatory arguments:</b>              |                              |                    |                        |
| setname                                  | CHARACTER(LEN=*)             | IN                 | name of the tracer set |
| airmass <sup>*)</sup>                    | REAL(DP), DIMENSION(:, :, :) | IN                 | airmass in kg          |
| airmass <sup>*)</sup>                    | REAL(DP)                     | IN                 | airmass in kg          |

<sup>\*)</sup>Note: This subroutine is overloaded for setting the airmass in the corresponding tracer set *representation* (e.g., the grid) either variable along the *representation* dimensions, or constant in all points of the corresponding tracer set *representation*.

## 6.5 The subroutine `tracpdef_integrate`

The subroutine `tracpdef_integrate` calculates the global tracer masses (Eqs. (18) and (19)) and checks the tolerance criterium for the negative mass (Eq. (20)).

| SUBROUTINE <code>tracpdef_integrate</code> |          | (status ,flag ,time_step_len ,p_pe) |                                           |
|--------------------------------------------|----------|-------------------------------------|-------------------------------------------|
| name                                       | type     | intent                              | description                               |
| <b>mandatory arguments:</b>                |          |                                     |                                           |
| status                                     | INTEGER  | OUT                                 |                                           |
| flag                                       | INTEGER  | IN                                  | switch (1 or 2)                           |
| time_step_len                              | REAL(DP) | IN                                  | time step length ( $\Delta t$ )           |
| p_pe                                       | INTEGER  | IN                                  | number of process in parallel environment |

This routine needs to be called twice. Once with `flag=1` for the integration (summation) on each processor in the parallel environment. After this, the results of all processors need to be distributed to each other. Then this routine is called a second time (with `flag=2`) for the integration (summation) over all processors and the checking of the tolerance criterion.

## 6.6 The subroutine `tracpdef_freemem`

The subroutine `tracpdef_freemem` deallocates the memory used for `TRACER_PDEF`.

|                                          |     |
|------------------------------------------|-----|
| SUBROUTINE <code>tracpdef_freemem</code> | ( ) |
|------------------------------------------|-----|

## 6.7 The subroutine `tracpdef_print`

The subroutine `tracpdef_print` outputs the global tracer masses of all tracer sets.

| SUBROUTINE <code>tracpdef_print</code> |         | (ldiagout) |             |
|----------------------------------------|---------|------------|-------------|
| name                                   | type    | intent     | description |
| <b>mandatory arguments:</b>            |         |            |             |
| ldiagout                               | LOGICAL | IN         | switch      |

The switch `ldiagout` can be used to restrict the output to one processor in a parallel environment.
