# Supplementary material for: Technical Note: Coupling of chemical processes with the Modular Earth Submodel System (MESSy) submodel TRACER
Source: Copernicus journal article supplement (doi:10.5194/acp-8-1677-2008), 2008-03-19
Supplement: Supplementary file 1 [file acp-8-1677-2008-supplement.zip › tracer/depend.mk]

# DO NOT DELETE THIS LINE - used by make depend
messy_main_data_si.o: messy_main_constants_mem.o
messy_main_mpi_si.o: messy_main_constants_mem.o
messy_main_tools.o: messy_main_constants_mem.o
messy_main_tools_si.o: messy_main_mpi_si.o
messy_main_tracer.o: messy_main_constants_mem.o messy_main_tools.o
messy_main_tracer_bi.o: messy_main_constants_mem.o messy_main_data_si.o
messy_main_tracer_bi.o: messy_main_mpi_si.o messy_main_tools_si.o
messy_main_tracer_bi.o: messy_main_tracer.o messy_main_tracer_family.o
messy_main_tracer_bi.o: messy_main_tracer_family_si.o
messy_main_tracer_bi.o: messy_main_tracer_mem_bi.o messy_main_tracer_pdef.o
messy_main_tracer_bi.o: messy_main_tracer_pdef_si.o
messy_main_tracer_family.o: messy_main_constants_mem.o messy_main_tools.o
messy_main_tracer_family.o: messy_main_tracer.o
messy_main_tracer_family_si.o: messy_main_data_si.o messy_main_mpi_si.o
messy_main_tracer_family_si.o: messy_main_tools_si.o messy_main_tracer.o
messy_main_tracer_family_si.o: messy_main_tracer_family.o
messy_main_tracer_family_si.o: messy_main_tracer_mem_bi.o
messy_main_tracer_mem_bi.o: messy_main_tracer.o
messy_main_tracer_pdef.o: messy_main_constants_mem.o messy_main_tools.o
messy_main_tracer_pdef.o: messy_main_tracer.o
messy_main_tracer_pdef_si.o: messy_main_constants_mem.o messy_main_data_si.o
messy_main_tracer_pdef_si.o: messy_main_mpi_si.o messy_main_tools.o
messy_main_tracer_pdef_si.o: messy_main_tools_si.o messy_main_tracer.o
messy_main_tracer_pdef_si.o: messy_main_tracer_pdef.o
messy_othersm.o: messy_main_constants_mem.o
messy_othersm_si.o: messy_main_constants_mem.o messy_main_mpi_si.o
messy_othersm_si.o: messy_main_tools.o messy_main_tools_si.o
messy_othersm_si.o: messy_main_tracer.o messy_main_tracer_bi.o
messy_othersm_si.o: messy_main_tracer_mem_bi.o messy_othersm.o
messy_ptrac.o: messy_main_constants_mem.o
messy_ptrac_si.o: messy_main_constants_mem.o messy_main_data_si.o
messy_ptrac_si.o: messy_main_mpi_si.o messy_main_tools.o messy_main_tools_si.o
messy_ptrac_si.o: messy_main_tracer.o messy_ptrac.o
tracer_bml.o: messy_main_constants_mem.o messy_main_data_si.o
tracer_bml.o: messy_main_tracer_bi.o messy_othersm_si.o messy_ptrac_si.o
