# Supplementary material for: Technical Note: Coupling of chemical processes with the Modular Earth Submodel System (MESSy) submodel TRACER
Source: Copernicus journal article supplement (doi:10.5194/acp-8-1677-2008), 2008-03-19
Supplement: Supplementary file 1 [file acp-8-1677-2008-supplement.zip › tracer/Makefile]

# -*- Makefile -*-
##############################################################################
srcdir     = .
bindir     = .
includedir = .

### choose Fortran90 compiler and options

SYSTEM := $(shell uname)
ifeq ($(SYSTEM),OSF1)
  ### f90 on alphas
  F90      = f90
  F90FLAGS = -O -cpp 
  DEFOPT   = -D
else
  ifeq ($(SYSTEM),Linux)
    ### lf95 = Lahey
    F90 = lf95
    ### -Cpp  = run C-preprocessor before compiling
    ###         (necessary because of some compiler directives in the code)
    ### --pca = protect constant argument (necessary for unknown reason)
    #F90FLAGS = -Cpp --pca
    #F90FLAGS = -Cpp --chk a,e,s   --pca --ap -O0
    #F90FLAGS = -Cpp --chk a,e,s   --pca --ap -O0 -g --trap --verbose
    F90FLAGS = -Cpp --chk a,e,s,u --pca --ap -O0 -g --trap
    DEFOPT = -D
  else
	ERROR
  endif
endif

# activate following lines for intel compiler (8.0.039) to overwrite
# previous settings
#F90      = ifort
#F90FLAGS = -cpp -O0
#DEFOPT   = -D

##############################################################################

### The above block defines the variables F90, F90FLAGS, INCLUDES, and
### LIBS. The if...else...endif constructs try to find suitable values
### for different architectures and machines. To implement the
### boxmodel on a new machine, you can simply overwrite the above
### definitions by activating the following block and entering
### appropriate values:
### F90      = 
### F90FLAGS = 

##############################################################################

include main.mk

include depend.mk
