# Supplementary material for: Technical Note: Coupling of chemical processes with the Modular Earth Submodel System (MESSy) submodel TRACER
Source: Copernicus journal article supplement (doi:10.5194/acp-8-1677-2008), 2008-03-19
Supplement: Supplementary file 1 [file acp-8-1677-2008-supplement.zip › tracer/Makefile.m]

# -*- Makefile -*-
# ----------------------------------------------
export
SHELL    = sh
# ----------------------------------------------

srcdir     = .
bindir     = ../../../bin
includedir = .

include main.mk

include depend.mk
# ----------------------------------------------
