# Supplementary material for: Technical Note: Coupling of chemical processes with the Modular Earth Submodel System (MESSy) submodel TRACER
Source: Copernicus journal article supplement (doi:10.5194/acp-8-1677-2008), 2008-03-19
Supplement: Supplementary file 1 [file acp-8-1677-2008-supplement.zip › tracer/messy_main_constants_mem.f90]

!****************************************************************************
!                Time-stamp: <2005-11-04 16:04:33 joeckel>
!****************************************************************************

! Definitions of machine precision constants as Fortran PARAMETERs for MESSy
! Definitions of physical constants as Fortran PARAMETERs for MESSy

! Authors:
! Rolf Sander,    MPICH, 2004: original code
! Patrick J�ckel, MPICH, 2004: preprocessor-directives removed; the 
!                              BASEMODEL now may use the constants of the
!                              Modular Earth Submodel System ...

MODULE messy_main_constants_mem

  IMPLICIT NONE
  ! PUBLIC is already default

  CHARACTER(LEN=*), PARAMETER :: modstr = 'MESSy'
  CHARACTER(LEN=*), PARAMETER :: modver = '1.4.1'

  INTEGER, PARAMETER :: nout = 6     ! standard output stream 
  INTEGER, PARAMETER :: nerr = 6     ! send also to standard output stream

  ! MACHINE PRECISION CONSTANTS
  INTEGER, PARAMETER :: sp = SELECTED_REAL_KIND(6,37)
  INTEGER, PARAMETER :: dp = SELECTED_REAL_KIND(12,307)
  INTEGER, PARAMETER :: i4 = SELECTED_INT_KIND(9)
  INTEGER, PARAMETER :: i8 = SELECTED_INT_KIND(14)
  INTEGER, PARAMETER :: wp = dp
  REAL(dp), PARAMETER :: TINY_DP = TINY(0._dp) ! mz_rs_20060114

  ! FLAGS
  REAL(DP), PARAMETER :: FLAGGED_BAD = -1.0E+34_dp  ! FERRET

  ! mz_rs_20070904+
  ! STRINGS FOR UNIFORM OUTPUT:
  CHARACTER(LEN=*), PARAMETER :: HLINE1 = &
    '***************************************'// &
    '***************************************'
  CHARACTER(LEN=*), PARAMETER :: HLINE2 = &
    '---------------------------------------'// &
    '---------------------------------------'
  CHARACTER(LEN=*), PARAMETER :: HLINE3 = &
    '.......................................'// &
    '.......................................'
  ! mz_rs_20070904-

  ! mz_pj_20070814+
  ! STRING LENGTHs
  INTEGER, PARAMETER :: STRLEN_SHORT  = 8
  INTEGER, PARAMETER :: STRLEN_MEDIUM = 24
  INTEGER, PARAMETER :: STRLEN_LONG   = 64
  INTEGER, PARAMETER :: STRLEN_VLONG  = 80
  INTEGER, PARAMETER :: STRLEN_ULONG  = 256
  ! mz_pj_20070814-

  ! PHYSICAL CONSTANTS
  REAL(dp), PARAMETER :: pi      = 3.14159265358979323846_dp
  REAL(dp), PARAMETER :: R_gas   = 8.314409_dp  ! R [J/K/mol]
  ! Stephan-Boltzmann constant
  REAL(dp), PARAMETER :: stbo    = 5.67E-8_dp   ! [W/m2/K4]
  REAL(dp), PARAMETER :: N_A     = 6.022045E23_dp ! Avogadro constant [1/mol]
  REAL(dp), PARAMETER :: g       = 9.80665_dp   ! gravity acceleration [m/s2]
  REAL(dp), PARAMETER :: T0      = 298.15_dp    ! standard temperature [K]
  REAL(dp), PARAMETER :: atm2Pa  = 101325._dp   ! conversion from [atm] to [Pa]
  REAL(dp), PARAMETER :: cal2J   = 4.1868_dp    ! conversion from [cal] to [J]
  REAL(dp), PARAMETER :: k_B     = 1.380662E-23_dp ! Boltzmann constant [J/K]
  REAL(dp), PARAMETER :: c_vKar  = 0.4          !  Karman constant [?]

  ! MXXX = molar mass of element XXX [g/mol]
  REAL(dp), PARAMETER :: MH  =   1.01
  REAL(dp), PARAMETER :: MC  =  12.01
  REAL(dp), PARAMETER :: MN  =  14.01
  REAL(dp), PARAMETER :: MF  =  19.00
  REAL(dp), PARAMETER :: MNa =  22.99
  REAL(dp), PARAMETER :: MO  =  16.00
  REAL(dp), PARAMETER :: MS  =  32.07
  REAL(dp), PARAMETER :: MCl =  35.45
  REAL(dp), PARAMETER :: MBr =  79.90
  REAL(dp), PARAMETER :: MI  = 126.90
  ! M_XXX = molar mass of compounds [g/mol]
  REAL(dp), PARAMETER :: M_O3  = 3._dp*MO      ! molar mass of ozone [g/mol]
  REAL(dp), PARAMETER :: M_H2O = 2._dp*MH + MO ! molar mass of H2O [g/mol]


  ! DRY AIR AND WATER VAPOUR THERMODYNAMIC CONSTANTS
  REAL(dp), PARAMETER :: tmelt   = 273.15_dp    ! melting temp. of ice/snow [K]
  REAL(dp), PARAMETER :: rho_H2O = 999.97_dp    ! density of H2O [kg/m3]
  REAL(dp), PARAMETER :: M_air   = 28.970_dp    ! molar mass of dry air [g/mol]
  REAL(dp), PARAMETER :: cp_air  = 1005.46_dp   ! specific heat of dry air at
                                                ! constant pressure [J/K/kg]
  ! gas constant for dry air [J/K/kg]
  REAL(dp), PARAMETER :: rd      = 1000._dp * R_gas/M_air ! 287.05_dp
  ! gas constant for water vapour
  REAL(dp), PARAMETER :: rv      = 1000._dp * R_gas/M_H2O ! 461.51_dp
  ! specific heat of water vapour at constant pressure [J/K/kg]
  REAL(dp), PARAMETER :: cpv     = 1869.46_dp
  ! dimensionless auxiliary constants
  REAL(dp), PARAMETER :: vtmpc1  = rv/rd-1.0_dp
  REAL(dp), PARAMETER :: vtmpc2  = cpv/cp_air-1.0_dp

  ! cloud and radiation
  REAL(dp),PARAMETER :: ceffmin = 10.0_dp    ! min eff.radius for ice cloud
  REAL(dp),PARAMETER :: ceffmax = 150.0_dp   ! max eff.radius for ice cloud
  REAL(dp),PARAMETER :: ccwmin  = 1.0e-7_dp  ! cloud water limit for cover>0

  ! PLANETARY PARAMETERS
  REAL(dp), PARAMETER :: radius_earth = 6371000.0_dp ! radius of the Earth [m]
  REAL(dp), PARAMETER :: solc  = 1365.0_dp           ! solar constant [W/m2]
  REAL(dp), PARAMETER :: OneDay       = 86400.0_dp   ! one day [s]
  ! *ratio: atmospheric height/radius of the earth.
  REAL(dp), PARAMETER :: crae = 0.1277e-02_dp

END MODULE messy_main_constants_mem

!*****************************************************************************
