# Supplementary material for: Technical Note: Coupling of chemical processes with the Modular Earth Submodel System (MESSy) submodel TRACER
Source: Copernicus journal article supplement (doi:10.5194/acp-8-1677-2008), 2008-03-19
Supplement: Supplementary file 1 [file acp-8-1677-2008-supplement.zip › tracer/messy_ptrac.f90]

! **********************************************************************
!
! MODULE FOR TESTING MASS CONSERVATION AND MONOTONICITY OF
! EULERIAN TRANSPORT ALGORITHMS WITH PASSIVE TRACERS
!
! CORE MODULE
!
! Author : Patrick Joeckel, MPICH, July  2002
!
! References:
!
! **********************************************************************

! **********************************************************************
MODULE messy_ptrac
! **********************************************************************

  ! ----------- >

  USE messy_main_constants_mem, ONLY: DP

  IMPLICIT NONE
  PRIVATE

  PUBLIC :: DP

  ! ----------- <

  CHARACTER(LEN=*), PARAMETER, PUBLIC :: modstr = 'ptrac'
  CHARACTER(LEN=*), PARAMETER, PUBLIC :: modver = '2.1'

! **********************************************************************
END MODULE messy_ptrac
! **********************************************************************
