# Supplementary material for: Technical Note: Coupling of chemical processes with the Modular Earth Submodel System (MESSy) submodel TRACER
Source: Copernicus journal article supplement (doi:10.5194/acp-8-1677-2008), 2008-03-19
Supplement: Supplementary file 1 [file acp-8-1677-2008-supplement.zip › tracer/othersm.nml]

! -*- f90 -*-
&CPL
!# SYNTAX: name or name_subname, scale, decay
INIT_TRACER(1) = 'NH', 1.0E-09,   1.0,
INIT_TRACER(2) = 'SH', 2.0E-09,   2.0,
INIT_TRACER(3) = 'V1', 100.0E-09, 3.0,
INIT_TRACER(4) = 'V2', 35.0E-09,  4.0,
INIT_TRACER(5) = 'ST', 24.0E-09,  5.0,
INIT_TRACER(6) = 'TR', 90.0E-09,  6.0,
/
