# Supplementary material for: Technical Note: Coupling of chemical processes with the Modular Earth Submodel System (MESSy) submodel TRACER
Source: Copernicus journal article supplement (doi:10.5194/acp-8-1677-2008), 2008-03-19
Supplement: Supplementary file 1 [file acp-8-1677-2008-supplement.zip › tracer/ptrac.nml]

! This file was created automatically by copynml.sh, do not edit
&CPL
C_SETS(1) = 'gp','lg','s1','','','','','','','',
C_NAME(1) = 'H','',         
C_UNIT(1)     = 'mol/mol',  
I_TYPE(1)     = 0,          
I_MEDIUM(1)   = 1,          
I_QUANTITY(1) = 1,          
R_AEROSOL_SIGMA(1)       = 2.0,      
R_AEROSOL_RADIUS(1)      = 1.E-06,   
CASK_I(1,:) = 1,1,1, 0,0,1, 0,0,1, 1,1,0, 2,4,1
CASK_R(1,:) = 1.0, 1.0, 0.1, 0.0, 2000.0,
CASK_S(1,:) = 'ptrac',
C_SETS(2) = 'gp','lg','s1','','','','','','','',
C_NAME(2) = 'NH','',         
C_UNIT(2)     = 'mol/mol',  
I_TYPE(2)     = 0,          
I_MEDIUM(2)   = 1,          
I_QUANTITY(2) = 1,          
R_AEROSOL_SIGMA(2)       = 2.0,      
R_AEROSOL_RADIUS(2)      = 1.E-06,   
CASK_I(2,:) = 1,1,1, 0,0,1, 0,0,1, 1,1,0, 2,4,1
CASK_R(2,:) = 1.0, 1.0, 0.1, 0.0, 2000.0,
CASK_S(2,:) = 'ptrac',
C_SETS(3) = 'gp','lg','s1','','','','','','','',
C_NAME(3) = 'SH','',         
C_UNIT(3)     = 'mol/mol',  
I_TYPE(3)     = 0,          
I_MEDIUM(3)   = 1,          
I_QUANTITY(3) = 1,          
R_AEROSOL_SIGMA(3)       = 2.0,      
R_AEROSOL_RADIUS(3)      = 1.E-06,   
CASK_I(3,:) = 1,1,1, 0,0,1, 0,0,1, 1,1,0, 2,4,1
CASK_R(3,:) = 1.0, 1.0, 0.1, 0.0, 2000.0,
CASK_S(3,:) = 'ptrac',
C_SETS(4) = 'gp','lg','s1','','','','','','','',
C_NAME(4) = 'ST','',         
C_UNIT(4)     = 'mol/mol',  
I_TYPE(4)     = 0,          
I_MEDIUM(4)   = 1,          
I_QUANTITY(4) = 1,          
R_AEROSOL_SIGMA(4)       = 2.0,      
R_AEROSOL_RADIUS(4)      = 1.E-06,   
CASK_I(4,:) = 1,1,1, 0,0,1, 0,0,1, 1,1,0, 2,4,1
CASK_R(4,:) = 1.0, 1.0, 0.1, 0.0, 2000.0,
CASK_S(4,:) = 'ptrac',
C_SETS(5) = 'gp','lg','s1','','','','','','','',
C_NAME(5) = 'TR','',         
C_UNIT(5)     = 'mol/mol',  
I_TYPE(5)     = 0,          
I_MEDIUM(5)   = 1,          
I_QUANTITY(5) = 1,          
R_AEROSOL_SIGMA(5)       = 2.0,      
R_AEROSOL_RADIUS(5)      = 1.E-06,   
CASK_I(5,:) = 1,1,1, 0,0,1, 0,0,1, 1,1,0, 2,4,1
CASK_R(5,:) = 1.0, 1.0, 0.1, 0.0, 2000.0,
CASK_S(5,:) = 'ptrac',
C_SETS(6) = 'gp','lg','s1','','','','','','','',
C_NAME(6) = 'V1','',         
C_UNIT(6)     = 'mol/mol',  
I_TYPE(6)     = 0,          
I_MEDIUM(6)   = 1,          
I_QUANTITY(6) = 1,          
R_AEROSOL_SIGMA(6)       = 2.0,      
R_AEROSOL_RADIUS(6)      = 1.E-06,   
CASK_I(6,:) = 1,1,1, 0,0,1, 0,0,1, 1,1,0, 2,4,1
CASK_R(6,:) = 1.0, 1.0, 0.1, 0.0, 2000.0,
CASK_S(6,:) = 'ptrac',
C_SETS(7) = 'gp','lg','s1','','','','','','','',
C_NAME(7) = 'V2','',         
C_UNIT(7)     = 'mol/mol',  
I_TYPE(7)     = 0,          
I_MEDIUM(7)   = 1,          
I_QUANTITY(7) = 1,          
R_AEROSOL_SIGMA(7)       = 2.0,      
R_AEROSOL_RADIUS(7)      = 1.E-06,   
CASK_I(7,:) = 1,1,1, 0,0,1, 0,0,1, 1,1,0, 2,4,1
CASK_R(7,:) = 1.0, 1.0, 0.1, 0.0, 2000.0,
CASK_S(7,:) = 'ptrac',
/
