# Supplementary material for: Technical Note: Coupling of chemical processes with the Modular Earth Submodel System (MESSy) submodel TRACER
Source: Copernicus journal article supplement (doi:10.5194/acp-8-1677-2008), 2008-03-19
Supplement: Supplementary file 1 [file acp-8-1677-2008-supplement.zip › tracer/tracer.nml]

! -*- f90 -*-
&CTRL
L_FAMILY     = T, !# USE TRACER FAMILIES (SEE CTRL_FAMILY BELOW)
L_PDEF       = T, !# SWITCH TRACER SUB-SUBMODEL PDEF (SEE CPL/CTRL_PDEF BELOW)
/

&CPL
!#
!# SYNTAX: setname, fullname, lpost, lav, lsd, lrerun, (grib-table,code,bits)
!# DEFAULTS:                    T     F    F     T      131          0   16 
TIO(1) = 'gp', 'CO_14C_01',  T, T, F, T, 131, 0, 16,
TIO(2) = 'gp', 'CO_14Cs_01', T, T, F, T, 131, 0, 16,
TIO(3) = 'gp', 'CO_14Ct_01', T, T, F, T, 131, 0, 16,
TIO(4) = 'gp', 'CO_14C_02',  T, T, F, T, 131, 0, 16,
TIO(5) = 'gp', 'CO_14Cs_02', T, T, F, T, 131, 0, 16,
TIO(6) = 'gp', 'CO_14Ct_02', T, T, F, T, 131, 0, 16,
/

&CTRL_FAMILY
l_verbose = F,   !# diagnostic output
i_diag_pe = 0,   !# ... for this p_pe
i_diag_jrow = 1, !# ... and this jrow
!#
!# NOTES:
!#    - MAX. NUMBER OF FAMILIES: 50
!#    - FAMILY-TYPE = 1: FAMILY = SUM OF TRACERS, TRACER = FRACTION OF FAMILY
!#                                - TRACER FRACTIONS NOT TRANSPORTED
!#                                - PROCESS SPECIFIC CONVERSION
!#                                - switch is meaningless for type 1
!#    -             = 2: FAMILY = SUM OF TRACERS, TRACER REMAINS
!#                                - TRACER TRANSPORTED
!#                                - RESCALED TO SUM AFTER TRANSPORT
!#                                - switch = .FALSE.: no re-scaling,
!#                                                    only summation
!#                                -        = .TRUE. (default): re-scaling ON
!#    - FAMILY TRACER MUST NOT EXIST
!#    - FIRST VALID TRACER IN FAMILY SPECIFIES ATTRIBUTES OF TRACER FAMILY
!#    - nadvect=nconvect=nvdiff = ON FOR FAMILIES WITH FAMILY-TYPE = 1
!#    - EACH TRACER CAN BE MEMBER OF ZERO OR ONE TRACER FAMILY
!#    - THE DEFAULT WEIGHT FOR EACH TRACER IS 1.0
!# SYNTAX:
!#    tracer-set, family-type, switch, family-name, family-subname,
!#    LIST OF TRACERS ...
!#    ... ('name' OR 'name_subname' OR 'name:weight' OR 'name_subname:weight')
!TF(1) = 'gp',1, ,'ClOX','','Cl','ClO','HOCl','OClO','Cl2O2:2.0','Cl2:2.0',!94*''
!TF(2) = 'gp',1, ,'BrOX','','Br','BrO','HOBr','BrCl','Br2:2.0',!95*''
!TF(3) = 'gp',1, ,'NOX','','N','NO','NO2','NO3','N2O5:2.0',!95*''
!TF(4) = 'gp',1, ,'HOx','','H','OH','HO2',!97*''
!TF(5) = 'gp',1, ,'Ox','','O1D','O3P','O3',!97*''
!
!TF(10) = 's1', 1,  , 'F1', '', 'NH', 'SH',
!TF(11) = 's1', 1,  , 'F2', '', 'TR', 'ST:2.0',
!TF(12) = 's1', 2, T, 'F3', '', 'V1', 'V2',
!
!TF(13) = 'gp', 1,  , 'F1', '', 'NH', 'SH',
!TF(14) = 'gp', 1,  , 'F2', '', 'TR', 'ST:2.0',
!TF(15) = 'gp', 2, T, 'F3', '', 'V1', 'V2',
!
!TF(16) = 'lg', 1,  , 'F1', '', 'NH', 'SH',
!TF(17) = 'lg', 1,  , 'F2', '', 'TR', 'ST:2.0',
!TF(18) = 'lg', 2, T, 'F3', '', 'V1', 'V2',
!
!TF(20) = 'gp',2, ,'AERO','ns','SO4_ns'!,'N_ns'
!TF(21) = 'gp',2, ,'AERO','ks','SO4_ks','OC_ks','BC_ks'!,'N_ks'
!TF(22) = 'gp',2, ,'AERO','as','SO4_as','OC_as','BC_as','SS_as','DU_as'!,'N_as'
!TF(23) = 'gp',2, ,'AERO','cs','SO4_cs','OC_cs','BC_cs','SS_cs','DU_cs'!,'N_cs'
!TF(24) = 'gp',2, ,'AERO','ki','OC_ki','BC_ki'!,'N_ks'
!TF(25) = 'gp',2, ,'AERO','ai','DU_ai'!,'N_as'
!TF(26) = 'gp',2,, 'AERO','ci','DU_ci'!,'N_cs'
/

&CPL_PDEF
!# TIMER
TPD_TIMER = 1,'steps','first',0
/

&CTRL_PDEF
!# diagnostic output ?
L_DIAGOUT = T,
!# SYNTAX: set-name, tracer-name, subname,
!#         reset to zero?, stop on exceed?, relative tolerance
TPD_DEFAULT(1) = 'gp',   '',     '',    T, F, 0.01,
TPD_DEFAULT(2) = 'lg',   '',     '',    T, F, 0.01,
TPD_DEFAULT(3) = 'lggp', '',     '',    F, F, 0.01,
!
TPD(1)         = 'gp',   'HNO3', 'nat', T, F,     ,
TPD(2)         = 'gp',   'N',    '',    T, F,     ,
!
/
