# Supplementary material for: Technical Note: Coupling of chemical processes with the Modular Earth Submodel System (MESSy) submodel TRACER
Source: Copernicus journal article supplement (doi:10.5194/acp-8-1677-2008), 2008-03-19
Supplement: Supplementary file 1 [file acp-8-1677-2008-supplement.zip › tracer/tracer_bml.f90]

! **********************************************************************
PROGRAM TRACER
! **********************************************************************

  ! BMIL
  USE messy_main_data_si,   ONLY: ngpblks, jrow
  USE messy_main_tracer_bi

  ! SMIL
  USE messy_ptrac_si
  USE messy_othersm_si

  IMPLICIT NONE

  INTEGER, PARAMETER :: n_time_steps = 3
  INTEGER            :: nt

  ! ====================================================================
  ! INITIALISATION PHASE
  ! ====================================================================
  
  ! INITIALIZE ---------------------------------------------------------
  CALL bml_initialize                 ! BML: initialize base model
  CALL main_tracer_initialize         ! BMIL: read namelist(s)
  CALL ptrac_initialize               ! SMIL: initalize submodel
  CALL othersm_initialize             ! SMIL: initalize submodel
  !# ADD OTHER SUBMODELS HERE

  ! NEW_TRACER ---------------------------------------------------------
  CALL main_tracer_new_tracer(1)      ! BMIL: define new tracer set(s)
  CALL ptrac_new_tracer               ! SMIL: add tracers to set(s)
  !# ADD OTHER SUBMODELS HERE
  CALL main_tracer_new_tracer(2)      ! BMIL: define tracer families
  CALL main_tracer_new_tracer(3)      ! BMIL: diagnostic output

  ! INIT_MEMORY --------------------------------------------------------
  CALL main_tracer_init_memory(1)     ! BMIL: setup tracer memory
  CALL ptrac_init_memory              ! SMIL: setup submodel memory
  !# ADD OTHER SUBMODELS HERE
  !
  ! a. ASSOCIATE TRACER MEMORY WITH MESSY DATA TRANSFER / EXPORT INTERFACE
  !    (NOTE: THIS IS NOT IMPLEMENTED IN THIS SIMPLE BOX MODEL)
  ! b. SET META INFORMATION OF FAMILY MEMBERS TO 'FRACTION'
  !    (NOTE: THIS IS FOR A PROPER ADVECTION INITIALISATION ...
  !           AND NOT REALLY REQUIRED IN THIS SIMPLE BOX MODEL)
  CALL main_tracer_init_memory(2)     ! BMIL: ...

  ! INIT_COUPLING -----------------------------------------------------
  ! RESET META INFORMATION OF FAMILY MEMBERS TO 'TRACER'
  ! (NOTE: THIS IS USED AFTER A PROPER ADVECTION INITIALISATION ...
  !           AND NOT REALLY REQUIRED IN THIS BOX MODEL)
  CALL main_tracer_init_coupling      ! BMIL: ...
  CALL othersm_init_coupling          ! SMIL: coupling between SMs
  !# ADD OTHER SUBMODELS HERE
  !

  ! INIT_TRACER -------------------------------------------------------
  ! TRACER INITIALISATION
  ! a. CHECK TRACER INITIALISATION FROM RESTART FILES
  !    (NOTE: THIS IS NOT IMPLEMENTED IN THIS SIMPLE BOX MODEL)
  CALL main_tracer_init_tracer(1)     ! BMIL: ...
  CALL ptrac_init_tracer              ! SMIL: initialize tracers
  CALL othersm_init_tracer            ! SMIL: initialize tracers
  !# ADD OTHER SUBMODELS HERE
  !
  ! b. CHECK TRACER INITIALISATION FROM SUBMODELS AND SET
  !    TO CONSTANT IF NOT YET INITIALIZED
  CALL main_tracer_init_tracer(2)     ! BMIL: ...
  ! c. DIAGNOSTIC OUTPUT OF TRACER INITIALISATION
  CALL main_tracer_init_tracer(3)     ! BMIL: diagn. out. of tracer init.

  ! ====================================================================
  ! TIME INTEGRATION PHASE
  ! ====================================================================
  time_loop: DO nt=1, n_time_steps

     CALL main_tracer_global_start(1)    ! BMIL
     CALL othersm_global_start           ! SMIL: (here 'diffusion')
     !# ADD OTHER SUBMODELS HERE
     !# NOTE: IN THE SUBMODEL SMIL, YOU CAN APPLY THE
     !#       CONVERSION ROUTINE SEQUENCE
     !#            CALL main_tracer_fconv_glb('sum',substr,S1TRSTR) ! TYPE-2
     !#            CALL main_tracer_fconv_glb('t2f',substr,S1TRSTR) ! TYPE-1
     !#            ... access families ...
     !#            CALL main_tracer_fconv_glb('f2t',substr,S1TRSTR) ! TYPE-1
     !#            CALL main_tracer_fconv_glb('rsc',substr,S1TRSTR) ! TYPE-2
     !
     CALL main_tracer_global_start(2)    ! BMIL

     !# ADD ADVECTION HERE

     CALL main_tracer_afteradv           ! BML

     dim3_loop: DO jrow=1, ngpblks

        ! ### CALL BASE MODEL PHYSICS HERE
        ! e.g., change pressi_3d, gboxarea_2d, ...

        CALL main_tracer_local_start

        CALL othersm_physc           ! SMIL: (here: 'decay')
        !# ADD OTHER SUBMODELS HERE, WHICH CHANGE TRACERS
        !# NOTE: IN THE SUBMODEL SMIL, YOU CAN APPLY THE
        !#       CONVERSION ROUTINE SEQUENCE
        !#            CALL main_tracer_fconv_loc('sum',substr,S1TRSTR) ! TYPE-2
        !#            CALL main_tracer_fconv_loc('t2f',substr,S1TRSTR) ! TYPE-1
        !#            ... access families ...
        !#            CALL main_tracer_fconv_loc('f2t',substr,S1TRSTR) ! TYPE-1
        !#            CALL main_tracer_fconv_loc('rsc',substr,S1TRSTR) ! TYPE-2

     END DO dim3_loop

     CALL main_tracer_global_end
     !# ADD OTHER SUBMODELS HERE

     CALL bml_output               ! BML: output routine(s)

  END DO time_loop

  ! ====================================================================
  ! FINALIZING PHASE
  ! ====================================================================
  CALL main_tracer_free_memory

CONTAINS

  ! --------------------------------------------------------------------
  SUBROUTINE bml_initialize

    USE messy_main_constants_mem, ONLY: dp, g
    USE messy_main_data_si,       ONLY: pressi_3d, gboxarea_2d, nlev, grmass

    IMPLICIT NONE

    ! surface area of grid boxes
    gboxarea_2d(:,:) = 1.0E6_dp       ! 1 km^2

    ! pressure
    pressi_3d(:,1,:) =   1000.0_dp ! Pa
    pressi_3d(:,2,:) =  50000.0_dp ! Pa
    pressi_3d(:,3,:) = 100000.0_dp ! Pa

    ! grid box airmass
    grmass(:,:,:) = ((pressi_3d(:,2:nlev+1,:) - pressi_3d(:,1:nlev,:)) / g) &
         * SPREAD(gboxarea_2d,2,nlev)

  END SUBROUTINE bml_initialize
  ! --------------------------------------------------------------------

  ! --------------------------------------------------------------------
  SUBROUTINE bml_output

    IMPLICIT NONE

    WRITE(*,*) 'END OF TIME STEP : ',nt

  END SUBROUTINE bml_output
  ! --------------------------------------------------------------------

! **********************************************************************
END PROGRAM TRACER
! **********************************************************************
